# Supplementary material for: Mass spectrometry protein expression profiles in colorectal cancer tissue associated with clinico-pathological features of disease
Source: Springer Nature journal article supplement (doi:10.1186/1471-2407-10-410), 2010-08-06
Supplement: Additional file 6 [file 1471-2407-10-410-s6.pdf]

**Additional file 6: Performance of model for predicting lymph node involvement based on mucosa spectra.** The *k*NN algorithm [29] was used in ‘leave-one-out’ cross-validation prediction with 3 features selected using a t-test statistic and the number of votes of the *k* neighbours weighted by cosine distance. The confidence represents the proportion of votes for the predicted class.

| Model    | Num Data                | Num Right       | Num Wrong  | Threshold | Num Abstain | <sup>1</sup> Abs Error | <sup>2</sup> ROC Error |
|----------|-------------------------|-----------------|------------|-----------|-------------|------------------------|------------------------|
| KNN      | 33                      | 26              | 7          | 0         | 0           | 0.212                  | 0.212                  |
| Specimen | <sup>3</sup> True Class | Predicted Class | Confidence | Error?    |             |                        |                        |
| 005NM    | LN                      | LP              | 1          | *         |             |                        |                        |
| 037NM    | LN                      | LP              | 1          | *         |             |                        |                        |
| 011NM    | LP                      | LP              | 1          |           |             |                        |                        |
| 016NM    | LP                      | LP              | 1          |           |             |                        |                        |
| 034NM    | LP                      | LP              | 1          |           |             |                        |                        |
| 003NM    | LP                      | LP              | 1          |           |             |                        |                        |
| 007NM    | LP                      | LP              | 1          |           |             |                        |                        |
| 039NM    | LN                      | LP              | 0.696      | *         |             |                        |                        |
| 009NM    | LP                      | LP              | 0.6848     |           |             |                        |                        |
| 017NM    | LN                      | LP              | 0.6834     | *         |             |                        |                        |
| 2085NM   | LP                      | LP              | 0.6648     |           |             |                        |                        |
| 2012NM   | LP                      | LP              | 0.6561     |           |             |                        |                        |
| 024NM    | LP                      | LP              | 0.6542     |           |             |                        |                        |
| 031NM    | LP                      | LP              | 0.6527     |           |             |                        |                        |
| 038NM    | LP                      | LP              | 0.6176     |           |             |                        |                        |
| 001NM    | LN                      | LN              | 1          |           |             |                        |                        |
| 002NM    | LN                      | LN              | 1          |           |             |                        |                        |
| 008NM    | LN                      | LN              | 1          |           |             |                        |                        |
| 023NM    | LN                      | LN              | 1          |           |             |                        |                        |
| 026NM    | LN                      | LN              | 1          |           |             |                        |                        |
| 032NM    | LN                      | LN              | 1          |           |             |                        |                        |
| 035NM    | LN                      | LN              | 1          |           |             |                        |                        |
| 2044NM   | LN                      | LN              | 1          |           |             |                        |                        |
| 004NM    | LP                      | LN              | 1          | *         |             |                        |                        |
| 021NM    | LP                      | LN              | 1          | *         |             |                        |                        |
| 028NM    | LN                      | LN              | 0.6874     |           |             |                        |                        |
| 020NM    | LN                      | LN              | 0.6743     |           |             |                        |                        |
| 2080NM   | LN                      | LN              | 0.6734     |           |             |                        |                        |
| 006NM    | LN                      | LN              | 0.6644     |           |             |                        |                        |
| 2018NM   | LN                      | LN              | 0.6587     |           |             |                        |                        |
| 029NM    | LN                      | LN              | 0.6414     |           |             |                        |                        |
| 2022NM   | LN                      | LN              | 0.6414     |           |             |                        |                        |
| 033NM    | LP                      | LN              | 0.6207     | *         |             |                        |                        |

<sup>1</sup>Absolute error rate; <sup>2</sup>Receiver operator characteristics error rate; <sup>3</sup>LN = lymph node negative; LP = lymph node positive
